# Supplementary material for: Persistence of auditory modulation of wind-induced escape behavior in crickets
Source: Front Physiol. 2023 May 9;14:1153913. doi: 10.3389/fphys.2023.1153913 (PMC10214467; doi:10.3389/fphys.2023.1153913)
Supplement: Supplementary file 1 [file DataSheet1.xlsx]

## Sheet: Fig.2A (response probability)
	Pattern 1		Pattern 2		Pattern 3		Pattern 4
	control	with tone	control	with tone	control	with tone	control	with tone
ind #1	1	0.95	1	1	0.95	0.75	1	1
ind #2	0.95	0.95	0.75	0.75	0.8	0.75	0.8	1
ind #3	1	1	0.9	1	0.95	0.95	1	0.9
ind #4	1	1	0.9	0.5	0.95	0.95	0.5	0.55
ind #5	1	1	1	1	0.85	1	1	0.9
ind #6	0.95	0.75	1	0.95	0.8	0.65	0.85	0.95
ind #7	0.95	0.95	0.9	0.7	1	0.95	0.75	0.65
ind #8	0.8	0.8	0.8	0.85	0.8	0.85	0.95	0.9
ind #9	0.8	0.9	0.85	0.85	0.8	0.9	0.8	0.75
ind #10	0.6	0.5	0.9	0.7	1	0.85	0.85	0.9
ind #11	0.8	0.85	0.6	0.7	1	0.95	0.8	0.85
ind #12	1	0.95	0.8	0.85	0.7	0.7	0.6	0.55
ind #13	1	0.95	1	1	1	0.95	0.9	0.95
ind #14	0.2	0.25	0.1	0.05	0.9	1	0.2	0.3
ind #15	0.25	0.2	0.25	0.15	0.25	0.1	0.15	0.15
P-value	0.1902		0.1843		0.2526		0.7776

## Sheet: Fig.2B (jumping probability)
	Pattern 1		Pattern 2		Pattern 3		Pattern 4
	control	with tone	control	with tone	control	with tone	control	with tone
ind #1	0.1	0.0526316	0.35	0.4	0.473684	0.8	0.6	0.5
ind #2	0.263158	0.473684	0.4	0.2	0.125	0.533333	0.4375	0.55
ind #3	0.15	0.2	0.444444	0.1	0.473684	0.684211	0.25	0.222222
ind #4	0.2	0.05	0.277778	0.4	0.210526	0.578947	0.25	0
ind #5	0.15	0.35	0	0.3	0.235294	0.3	0.3	0.111111
ind #6	0.105263	0.2	0.55	0.578947	0	0.0769231	0.294118	0.421053
ind #7	0.15	0.368421	0	0.285714	0.05	0.368421	0.333333	0.0769231
ind #8	0	0.1	0.1875	0.647059	0.0625	0	0.210526	0.111111
ind #9	0.125	0.111111	0	0.0588235	0.6	0.764706	0.1875	0.133333
ind #10	0.166667	0	0.05	0	0.1	0.315789	0.235294	0.166667
ind #11	0.25	0.0588235	0	0.0714286	0.368421	0.578947	0.1875	0.235294
ind #12	0.45	0.157895	0.3125	0.176471	0.1	0.105263	0.166667	0.0909091
ind #13	0	0	0	0	0.444444	0.35	0	0
ind #14	0	0	0	0	0	0	0	0
ind #15	0	0	0	0	0	0	0	0
P-value	0.8445		0.4101		0.007915		0.1261

## Sheet: Fig.4A (Mov.direction_running)
	Pattern 1		Pattern 2		Pattern 3		Pattern 4
	control	with tone	control	with tone	control	with tone	control	with tone
ind #1	136.122	131.485	66.4996	90.6802	76.892	122.682	84.7283	86.0842
ind #2	120.773	120.194	79.9867	78.7932	86.9738	89.0954	107.936	133.989
ind #3	112.727	120.944	75.2317	132.671	66.4996	90.6802	85.2598	67.4427
ind #4	111.038	125.44	79.8108	101.719	79.9867	78.7932	72.5832	87.6981
ind #5	121.446	106.675	90.0689	119.908	97.5823	118.111	78.1822	83.8999
ind #6	75.0204	72.4067	76.0231	56.9109	103.635	114.589	76.7008	88.1442
ind #7	82.6246	90.5286	92.3052	103.654	85.228	103.929	101.543	83.1445
ind #8	121.497	106.612	131.775	131.034	92.0439	125.152	96.7609	96.2811
ind #9	101.32	95.8623	96.0741	115.867	96.1853	105.206	119.731	96.5813
ind #10	138.301	116.44	92.0439	125.152	75.1331	93.1094	82.2295	106.16
ind #11	105.822	118.323	112.365	120.85	83.3404	114.188	95.7278	111.965
ind #12	86.4058	103.065	133.842	138.16	94.6911	118.196	98.5887	109.043
ind #13	106.656	106.638	104.502	121.245	94.3697	110.056	112.282	121.615
ind #14	91.0823	103.904	78.6255	101.175	107.165	126.762	88.3851	113.094
ind #15	118.673	94.4497	104.635	111.17	109.444	114.107	68.9732	89.4484
P-value	0.7531		0.04333		0.0005428		0.1128
								(degree)

## Sheet: Fig.4B (Diff. mov. dir._running
	Pattern 1	Pattern 2	Pattern 3	Pattern 4
ind #1	-4.63721	24.1807	45.7897	1.35591
ind #2	-0.57937	-1.19351	2.12156	26.0529
ind #3	8.21733	57.4394	24.1807	-17.8171
ind #4	14.4025	21.9082	-1.19351	15.1149
ind #5	-14.7701	29.8396	20.5283	5.71771
ind #6	-2.61368	-19.1122	10.9543	11.4434
ind #7	7.90402	11.3491	18.7007	-18.3982
ind #8	-14.885	-0.741439	33.1084	-0.479817
ind #9	-5.4574	19.7926	9.02063	-23.1498
ind #10	-21.8612	33.1084	17.9763	23.9304
ind #11	12.5015	8.48509	30.8476	16.2371
ind #12	16.6596	4.31803	23.5045	10.4547
ind #13	-0.0181999	16.7429	15.6861	9.33296
ind #14	12.8222	22.5498	19.5963	24.7089
ind #15	-24.2235	6.53501	4.6625	20.4752
				(degree)
P-value
P1-P2	0.043308
P1-P3	0.001767
P1-P4	0.861
P2-P3	3.8238
P2-P4	1.0344
P3-P4	0.23562

## Sheet: Fig.5A (Max velocity_running)
	Pattern 1		Pattern 2		Pattern 3		Pattern 4
	control	with tone	control	with tone	control	with tone	control	with tone
ind #1	0.455536	0.422028	0.45916	0.37748	0.466611	0.418407	0.422277	0.458005
ind #2	0.502332	0.497107	0.385267	0.36294	0.53633	0.539862	0.317616	0.576735
ind #3	0.46756	0.446446	0.245019	0.512753	0.45916	0.37748	0.509335	0.231526
ind #4	0.435396	0.448033	0.451641	0.329574	0.385267	0.36294	0.383728	0.172446
ind #5	0.429928	0.354661	0.223689	0.314882	0.482593	0.35578	0.311887	0.310565
ind #6	0.532627	0.487303	0.305264	0.538788	0.280563	0.27689	0.565358	0.497309
ind #7	0.512235	0.534317	0.222862	0.264226	0.33579	0.353731	0.33978	0.371311
ind #8	0.343054	0.523452	0.313256	0.269566	0.36899	0.418318	0.107974	0.169357
ind #9	0.345253	0.390807	0.139049	0.17453	0.32317	0.314092	0.813631	0.754798
ind #10	0.355369	0.156842	0.375693	0.24051	0.563135	0.219112	0.277294	0.3473
ind #11	0.598933	0.583529	0.357769	0.396249	0.518138	0.343195	0.501405	0.282537
ind #12	0.433968	0.51875	0.620583	0.748394	0.27353	0.272815	0.137306	0.176849
ind #13	0.549201	0.562071	0.398456	0.463629	0.521523	0.503806	0.569995	0.422716
ind #14	0.08621	0.375953	0.524763	0.423821	0.5764	0.574552	0.743862	0.509883
ind #15	0.394238	0.435508	0.296585	0.25918	0.4837	0.527291	0.375435	0.354708
P-value	0.5025		0.4582		0.09088		0.2107
								(m/s)

## Sheet: Fig.5B (Mov. distance_running)
	Pattern 1		Pattern 2		Pattern 3		Pattern 4
	control	with tone	control	with tone	control	with tone	control	with tone
ind #1	3.0415	2.92984	3.11304	2.26386	4.53805	3.58091	3.69937	3.3885
ind #2	3.60458	3.57424	3.03627	3.30535	4.32392	4.56206	3.33915	6.45081
ind #3	4.3225	3.44856	2.15522	4.94228	3.11304	2.26386	7.59778	2.41623
ind #4	3.22088	3.41312	5.03345	3.84225	3.03627	3.30535	3.46167	1.89558
ind #5	3.07174	3.19045	2.03235	3.74435	3.16204	2.67616	2.25872	3.24531
ind #6	4.33415	4.11018	3.04997	4.62833	2.06235	1.76303	5.77394	2.57768
ind #7	3.46128	3.81582	1.56875	1.97034	3.06818	3.48005	4.8753	6.55743
ind #8	3.51927	4.35915	1.81593	1.74778	3.08364	2.7861	1.7028	2.15996
ind #9	3.33808	3.50763	0.8126	1.09098	3.22031	2.9663	7.17684	7.81321
ind #10	3.05184	0.865484	3.04335	1.88683	5.95057	2.03306	2.20745	2.95942
ind #11	4.60924	4.81335	3.8873	3.75055	4.28886	2.41147	4.40163	2.97917
ind #12	4.3133	4.6179	5.59228	8.75684	1.74865	1.7088	0.748732	0.949078
ind #13	4.89136	5.10095	4.17045	4.98991	4.48311	4.24313	6.82544	4.21397
ind #14	0.421738	6.13092	6.34317	2.85606	4.70365	4.63108	4.51957	2.29066
ind #15	6.72007	5.30885	1.92516	2.14244	4.42122	4.30448	0.728879	0.385686
P-value	0.6282		0.5111		0.06353		0.2893
								(cm)

## Sheet: Fig.5C (Reaction time_running)
	Pattern 1		Pattern 2		Pattern 3		Pattern 4
	control	with tone	control	with tone	control	with tone	control	with tone
ind #1	80.2083	79.8611	91.25	111.458	129.375	129.167	110.156	89.375
ind #2	50.4464	54.375	102.917	98.4375	108.929	62.5	103.472	77.0833
ind #3	44.1176	45.3125	117.788	89.5833	108.125	71.875	103.333	108.036
ind #4	68.3594	63.8158	97.2222	100	98.3333	92.1875	118.75	67.5
ind #5	56.25	41.8269	80	83.6806	97.5962	95.5357	78.125	88.6719
ind #6	118.382	95.8333	95.6731	145.833	97.2656	90.1042	76.5625	91.4773
ind #7	83.2237	66.4474	116.875	100.893	101.316	125.521	30.625	79.1667
ind #8	91.25	136.111	81.9444	87.5	94.7115	34.375	97.5	105.859
ind #9	85.2679	82.4219	78.4722	88.75	120.833	102.778	65.8654	70.1923
ind #10	122.5	21.875	104.327	97.9167	94.5312	45.3125	65.3846	87.0833
ind #11	101.042	89.0625	97.0588	93.75	90.625	116.827	102.404	87.0192
ind #12	60.7955	97.2656	87.1528	63.8393	152.679	132.589	23.75	31.1261
ind #13	81.25	75	79.6875	109.615	80.2083	77.2059	81.5972	83.5526
ind #14	68.75	73.75	94.8864	99.5536	95.625	89.9038	114.062	132.292
ind #15	109.375	146.875	114.145	32.1875	86.9792	76.5625	68.75	118.75
P-value	0.7002		0.7558		0.5325		0.4648
								(ms)

## Sheet: Fig.6A (Mov. direction_jumping)
	Pattern 1		Pattern 2		Pattern 3		Pattern 4
	control	with tone	control	with tone	control	with tone	control	with tone
ind #1	75.1725	93.0887	57.2422	69.0448	67.3955	80.3423	105.255	79.2437
ind #2	137.211	106.293	56.4832	96.5012	76.7902	68.0878	99.5004	118.559
ind #3	89.8736	54.5546	56.0207	43.7398	45.676	41.0815	48.4647	57.7951
ind #4	122.579	83.1252	28.6036	81.5882	61.5093	73.0962	88.8588	-
ind #5	106.138	84.7886	-	81.5898	127.403	60.6617	83.4688	98.3165
ind #6	72.1252	96.5912	71.3388	69.8826	-	55.6006	58.1633	51.6039
ind #7	67.0518	113.891	-	61.3128	141.665	70.6154	70.4679	124.075
ind #8	-	71.2401	53.512	47.9401	95.8522	-	70.595	13.9309
ind #9	39.6762	124.329	-	123.881	75.9591	69.0768	46.6285	59.2981
ind #10	10.8322	-	96.0738	-	55.3845	63.1095	106.279	81.6468
ind #11	123.73	145.61	-	76.5117	88.2262	115.526	61.6426	60.0138
ind #12	89.6067	134.11	75.797	35.736	107.381	42.2885	100.968	90.0602
ind #13	-	-	-	-	91.308	82.1968	-	-
ind #14	-	-	-	-	-	-	-	-
ind #15	-	-	-	-	-	-	-	-
P-value	0.2767		0.2263		0.09351		0.8018
								(degree)
	" - " indicates no jumping response.

## Sheet: Fig.6B (Max velocity_junping)
	Pattern 1		Pattern 2		Pattern 3		Pattern 4
	control	with tone	control	with tone	control	with tone	control	with tone
ind #1	0.520276	0.535543	0.405231	0.450518	0.963267	0.814809	0.486894	0.481589
ind #2	0.726643	1.04833	0.421015	0.390514	0.784911	0.66715	0.616132	0.502629
ind #3	0.791358	0.859598	0.381169	0.397696	1.07864	0.808037	0.255234	0.310965
ind #4	0.489562	0.59385	0.483103	0.494255	0.612587	0.548966	0.289542	-
ind #5	0.981992	0.816501	-	0.298937	0.614276	0.846237	0.649556	0.285341
ind #6	0.222777	0.579378	0.416769	0.346395	-	0.407134	0.489488	0.575974
ind #7	0.946836	0.949241	-	0.395135	0.473927	0.416964	0.697659	0.33671
ind #8	-	0.674369	0.747371	0.414572	0.391662	-	0.289542	0.45382
ind #9	0.576632	1.14807	-	0.422518	0.785293	0.883126	0.663072	0.755892
ind #10	0.841261	-	0.184406	-	0.80112	0.822577	0.367438	0.479146
ind #11	0.886341	0.868604	-	0.404579	0.801437	0.769102	0.864721	0.545729
ind #12	0.798347	0.964268	0.814079	0.510967	0.697254	0.632282	0.23036	0.230612
ind #13	-	-	-	-	1.02475	1.11061	-	-
ind #14	-	-	-	-	-	-	-	-
ind #15	-	-	-	-	-	-	-	-
P-value	0.2326		0.3748		0.7676		0.5935
								(m/s)
	" - " indicates no jumping response.

## Sheet: Fig.6C (Mov. distance_jumping)
	Pattern 1		Pattern 2		Pattern 3		Pattern 4
	control	with tone	control	with tone	control	with tone	control	with tone
ind #1	4.34625	4.40505	3.04454	3.55234	12.9523	12.7502	2.99853	2.70218
ind #2	8.10175	11.827	3.58454	2.96787	9.5355	5.76363	9.33561	7.5318
ind #3	10.8459	11.8909	2.55604	2.37318	16.0934	9.95139	1.14544	1.55262
ind #4	5.55865	7.9784	3.45807	3.96558	6.6176	6.02469	3.54212	-
ind #5	10.6303	10.8463	-	1.46544	5.52721	8.49627	7.27492	0.94966
ind #6	4.79568	6.72274	2.54103	1.5901	-	3.24485	3.15352	8.51949
ind #7	11.3075	14.3203	-	2.16446	3.82655	3.02284	6.93287	4.46798
ind #8	-	6.50457	7.24206	4.29745	5.41103	-	0.235468	3.66401
ind #9	15.095	18.7684	-	2.10571	10.9647	10.4289	7.28241	9.88965
ind #10	13.5891	-	0.307937	-	8.37568	9.05748	2.03928	1.88625
ind #11	14.0018	9.0743	-	2.48227	13.9653	9.27795	12.044	5.20978
ind #12	12.1559	13.922	12.9979	3.90334	7.32866	5.98891	3.92814	1.75192
ind #13	-	-	-	-	14.6754	14.8947	-	-
ind #14	-	-	-	-	-	-	-	-
ind #15	-	-	-	-	-	-	-	-
P-value	0.7857		0.2795		0.3945		0.6599
								(cm)
	" - " indicates no jumping response.

[truncated: 1 more sheets: Fig.6D (Reaction time_jumping)]
